# Supplementary material for: Prediction of superconductivity in sandwich XB4 (X = Li, Be, Zn and Ga) films
Source: Royal Society of Chemistry journal article supplement (doi:10.1039/d3cp03427e), 2023-01-01
Supplement: d3cp03427e1.pdf [file d3cp03427e1.pdf]

## Supplementary information for ‘Prediction of Superconductivity in Sandwich $\text{XB}_4$ (X=Li, Be, Zn and Ga) Films’

Shuming Zeng,<sup>1,\*</sup> Yinchang Zhao,<sup>2</sup> Muhammad Zulfiqar,<sup>3,†</sup> and Geng Li<sup>4,5,‡</sup>

<sup>1</sup>*College of Physics Science and Technology,  
Yangzhou University, Jiangsu 225009, China*

<sup>2</sup>*Department of Physics, Yantai University,  
Yantai 264005, People’s Republic of China*

<sup>3</sup>*Department of Physics, University of Sargodha, 40100 Sargodha, Pakistan*

<sup>4</sup>*School of Materials Science and Engineering,  
National Institute for Advanced Materials, Nankai University,  
Tongyan Road 38, Tianjin 300350, China.*

<sup>5</sup>*National Supercomputer Center in Tianjin, Tianjin 300457, China.*

(Dated: September 21, 2023)

---

\* zengsm@yzu.edu.cn

† muhammadzulfiqar@uos.edu.pk

‡ ligeng@nsccl-tj.cn

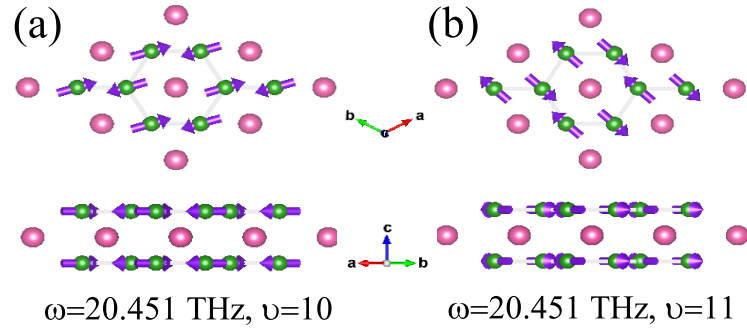

FIG. S1. Schematic diagram of the phonon modes of  $\text{LiB}_4$  at the  $\Gamma$  point.  $\omega$  and  $\nu$  are the frequency and phonon band index, respectively. The length of the arrows is proportional to the amplitude of vibration. The top is the top view and the bottom is the side view in each subgraph.

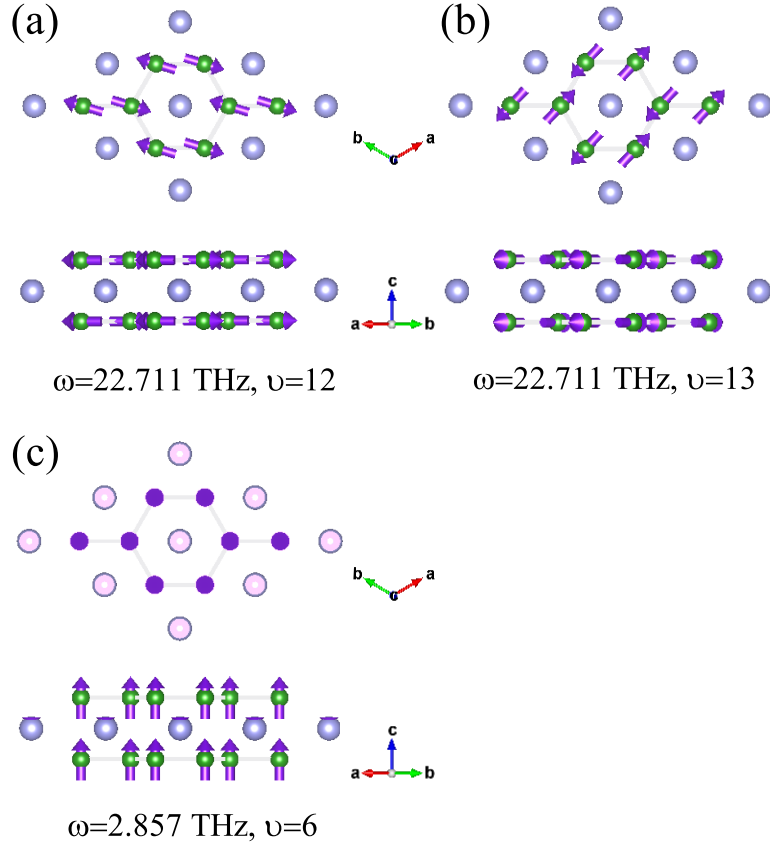

FIG. S2. Schematic diagram of the phonon modes of  $\text{BeB}_4$  at the  $\Gamma$  point.  $\omega$  and  $\nu$  are the frequency and phonon band index, respectively. The length of the arrows is proportional to the amplitude of vibration. The top is the top view and the bottom is the side view in each subgraph.

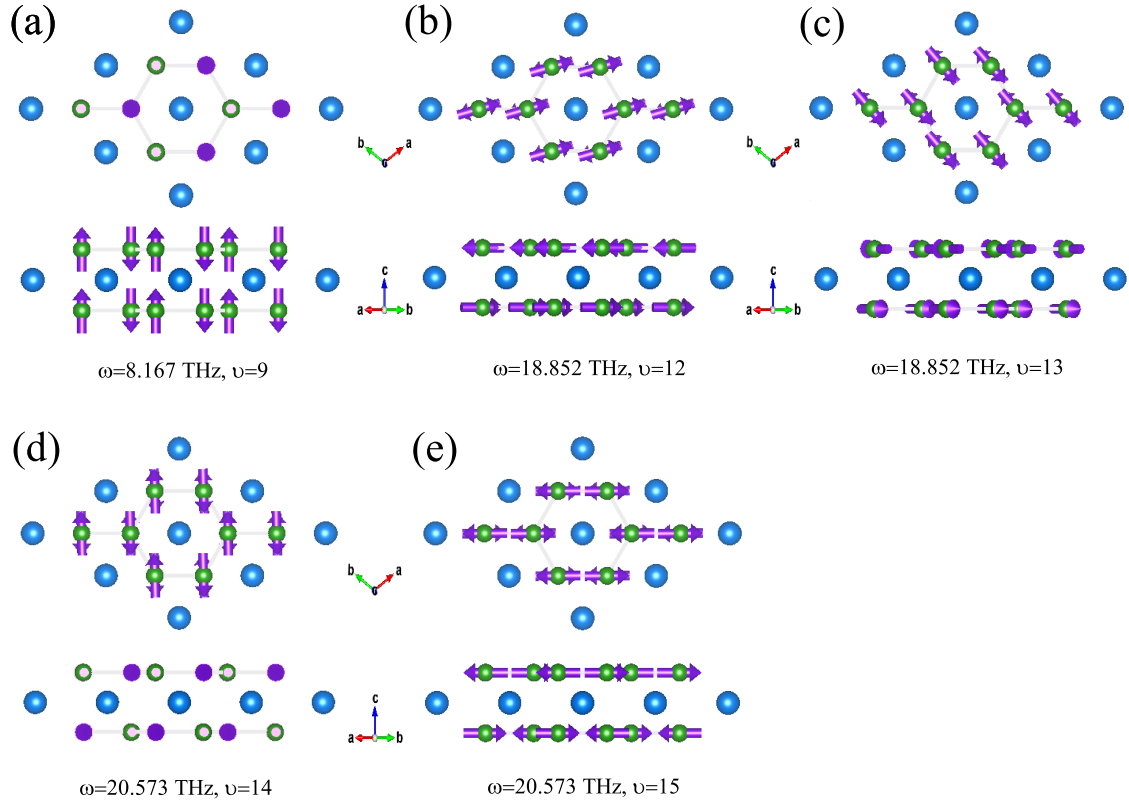

FIG. S3. Schematic diagram of the phonon modes of  $\text{ZnB}_4$  at the  $\Gamma$  point.  $\omega$  and  $\nu$  are the frequency and phonon band index, respectively. The length of the arrows is proportional to the amplitude of vibration. The top is the top view and the bottom is the side view in each subgraph.

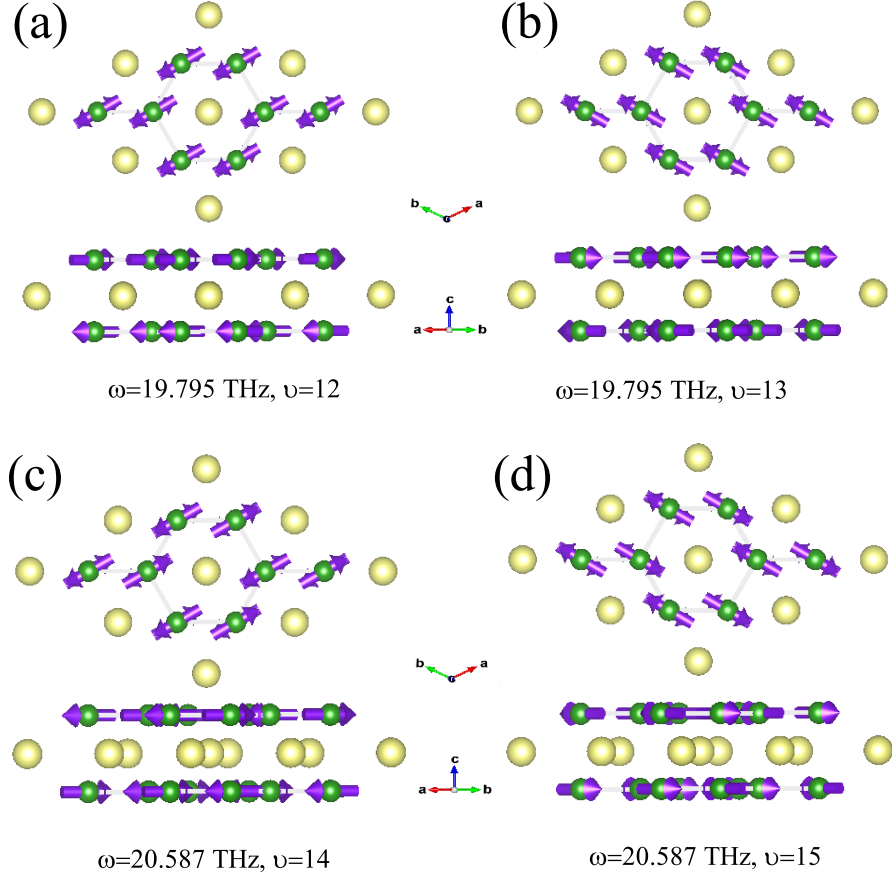

FIG. S4. Schematic diagram of the phonon modes of GaB<sub>4</sub> at the  $\Gamma$  point.  $\omega$  and  $\nu$  are the frequency and phonon band index, respectively. The length of the arrows is proportional to the amplitude of vibration. The top is the top view and the bottom is the side view in each subgraph.

TABLE SI. The convergence tests for the k-mesh ( $\text{ZnB}_4$ ). Each test using 96 cores.

| k-mesh                  | $\lambda$ | $T_c^{\mu^*=0.10}$ (K) | Times (hour) |
|-------------------------|-----------|------------------------|--------------|
| $18 \times 18 \times 1$ | 1.23      | 38.69                  | 15.11        |
| $36 \times 36 \times 1$ | 1.24      | 38.77                  | 41.45        |
| $48 \times 48 \times 1$ | 1.24      | 38.76                  | 103.64       |
| $60 \times 60 \times 1$ | 1.24      | 38.76                  | 184.56       |

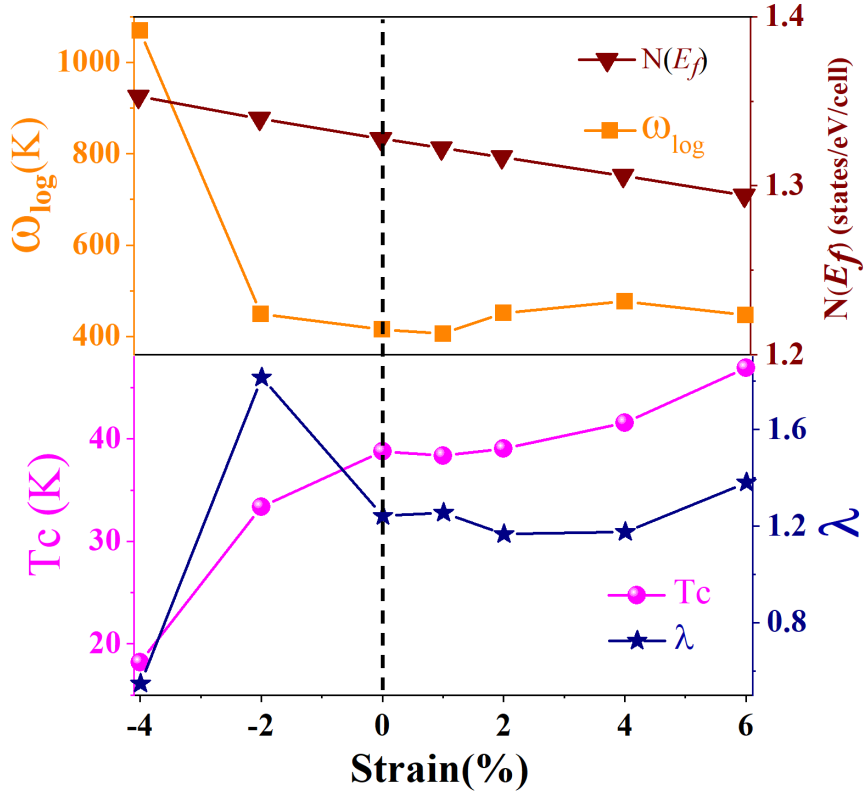

FIG. S5. Superconducting transition temperature  $T_c$  (magenta), EPC constant  $\lambda$  (royal), DOS of the FS  $N(E_f)$  (wine), and logarithmically averaged phonon frequency  $\omega_{\log}$  (orange) versus the strain  $\varepsilon$  for the sandwiched  $\text{ZnB}_4$  film.

## I. SCRIPT FOR $T_c$ CALCULATION

1. Script to calculate electron-phonon coefficients

```
cat > elph.in <<eof
phonons of ZnB4
&inputph
tr2_ph=1.0d-14, !!! effect phonon quality
prefix=' ZnB4',
fildvscf='ZnB4dv',
amass(1)=65.409,
amass(2)=10.811,
outdir='./',
fildyn='ZnB4.dyn',
electron_phonon='interpolated',
el_ph_sigma=0.005,
el_ph_nsigma=10,
alpha_mix=0.3,
trans=.true.,
ldisp=.true.,
nq1=9, nq2=9, nq3=1
/
eof
```

mpirun -np 96 ph.x < elph.in > elph.out

2. Script to calculate  $T_c$

```
cat > tc.in <<eof
30 0.5 1 ! emax (something more than highest phonon mode in THz),
degauss, smearing method
12 ! Number of q-points for which EPC is calculated,
0.000000 0.000000 0.000000 1
0.000000 0.1283001 0.000000 6
0.000000 0.2566001 0.000000 6
0.000000 0.3849002 0.000000 6
0.000000 0.5132002 0.000000 6
0.1111111 0.1924501 0.000000 6
0.1111111 0.3207501 0.000000 12
0.1111111 0.4490502 0.000000 12
0.1111111 0.5773503 0.000000 6
0.2222222 0.3849002 0.000000 6
0.2222222 0.5132002 0.000000 12
0.3333333 0.5773503 0.000000 2
elph_dir/elph.inp_lambda.1
elph_dir/elph.inp_lambda.2
elph_dir/elph.inp_lambda.3
elph_dir/elph.inp_lambda.4
elph_dir/elph.inp_lambda.5
elph_dir/elph.inp_lambda.6
```

```

elph_dir/elph.inp_lambda.7
elph_dir/elph.inp_lambda.8
elph_dir/elph.inp_lambda.9
elph_dir/elph.inp_lambda.10
elph_dir/elph.inp_lambda.11
elph_dir/elph.inp_lambda.12
0.10          ! \mu the Coloumb coefficient in the modified
              ! Allen-Dynes formula for T_c (via \omega_log)

```

eof

lambda.x < elph.in > elph.out

### 3. Output for $T_c$ calculation

```

lambda = 1.683100 ( 1.682938 ) <log w>= 437.273 K N(Ef)=
11.565178 at degauss= 0.005
lambda = 1.318463 ( 1.318304 ) <log w>= 420.748 K N(Ef)=
9.286085 at degauss= 0.010
lambda = 1.254620 ( 1.254468 ) <log w>= 416.215 K N(Ef)=
8.963193 at degauss= 0.015
lambda = 1.241619 ( 1.241492 ) <log w>= 415.578 K N(Ef)=
8.974573 at degauss= 0.020
lambda = 1.234089 ( 1.233998 ) <log w>= 416.056 K N(Ef)=
9.021735 at degauss= 0.025
lambda = 1.228656 ( 1.228600 ) <log w>= 416.901 K N(Ef)=
9.085480 at degauss= 0.030
lambda = 1.226354 ( 1.226326 ) <log w>= 417.733 K N(Ef)=
9.175427 at degauss= 0.035
lambda = 1.226925 ( 1.226919 ) <log w>= 418.260 K N(Ef)=
9.289254 at degauss= 0.040
lambda = 1.228852 ( 1.228868 ) <log w>= 418.361 K N(Ef)=
9.415892 at degauss= 0.045
lambda = 1.230448 ( 1.230489 ) <log w>= 418.016 K N(Ef)=
9.543561 at degauss= 0.050

```

| lambda  | omega_log | T_c    |
|---------|-----------|--------|
| 1.68310 | 437.273   | 55.214 |
| 1.31846 | 420.748   | 42.036 |
| 1.25462 | 416.215   | 39.306 |
| 1.24162 | 415.578   | 38.768 |
| 1.23409 | 416.056   | 38.534 |
| 1.22866 | 416.901   | 38.409 |
| 1.22635 | 417.733   | 38.399 |
| 1.22692 | 418.260   | 38.469 |
| 1.22885 | 418.361   | 38.551 |
| 1.23045 | 418.016   | 38.579 |
